# Supplementary material
Source: Springer Nature journal article supplement (https://www.springermedizin.de/resource/supplementary/12913_2013_2950_MOESM4_ESM.pdf/9532010)
Supplement: MOESM4 [file 9532010]

|                   | Random sequence | Allocation concealment | Blinding participants | Blinding outcome | Incomplete outcome | Selective reporting |
|-------------------|-----------------|------------------------|-----------------------|------------------|--------------------|---------------------|
| Turner 2012       |                 |                        |                       |                  |                    |                     |
| Walker 2011       |                 |                        |                       |                  |                    |                     |
| Heisler 2010      |                 |                        |                       |                  |                    |                     |
| Dale 2009         |                 |                        |                       |                  |                    |                     |
| Samuel-Hodge 2009 |                 |                        |                       |                  |                    |                     |
| Parry 2009        |                 |                        |                       |                  |                    |                     |
| Batik 2008        |                 |                        |                       |                  |                    |                     |
| Carroll 2007      |                 |                        |                       |                  |                    |                     |
| Young 2005        |                 |                        |                       |                  |                    |                     |
| Keyserling 2002   |                 |                        |                       |                  |                    |                     |
